# Supplementary material for: Influence of the electrocatalyst layer thickness on alkaline DEFC performance
Source: Royal Society of Chemistry journal article supplement (doi:10.1039/d2se01729f), 2023-01-01
Supplement: d2se01729f1.pdf [file d2se01729f1.pdf]

## SUPPLEMENTARY MATERIAL

### **Influence of the electrocatalyst layer thickness on alkaline DEFC performance**

*Michaela Roschger<sup>a</sup>, Sigrid Wolf<sup>a</sup>, Kurt Mayer<sup>a</sup>, Andreas Billiani<sup>a</sup>, Boštjan Genorio<sup>b</sup>, Selestina Gorgieva<sup>c</sup>, and Viktor Hacker<sup>a</sup>*

*<sup>a</sup>Institute of Chemical Engineering and Environmental Technology, Graz University of Technology, Inffeldgasse 25/C, 8010 Graz, Austria*

*<sup>b</sup>Faculty of Chemistry and Chemical Technology, University of Ljubljana, Večna pot 113, 1000 Ljubljana, Slovenia*

*<sup>c</sup>Faculty of Mechanical Engineering, University of Maribor, Smetanova 17, 2000 Maribor, Slovenia*

#### **Corresponding author:**

Michaela Roschger  
Graz University of Technology  
Institute of Chemical Engineering and Environmental Technology  
Inffeldgasse 25/C, 8010 Graz, Austria  
E-mail: [michaela.roschger@tugraz.at](mailto:michaela.roschger@tugraz.at)

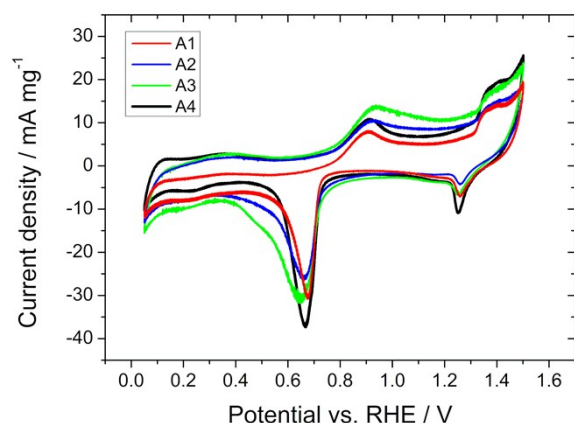

**Figure S1:** Electrochemical half-cell characterization of the Pd<sub>85</sub>Ni<sub>10</sub>Bi<sub>5</sub>/C electrodes in a potential range from 0.05 V – 1.50 V vs. RHE with a scan rate of 10 mV s<sup>-1</sup> in 5 M KOH at RT.

**Table S1:** Electrochemical characterization results of the cathodes and anodes for condition I, II and III.

|           | OCP / V vs. RHE |       |       | $E_{onset}^a$ / V vs. RHE |       |       | $j^c$ / mA cm <sup>-2</sup> |        |         | $R$ / $\Omega$ cm <sup>2</sup> |           |           |
|-----------|-----------------|-------|-------|---------------------------|-------|-------|-----------------------------|--------|---------|--------------------------------|-----------|-----------|
|           | I               | II    | III   | I                         | II    | III   | I                           | II     | III     | I                              | II        | III       |
| <b>C1</b> | 0.988           | 0.984 | 0.980 | 0.881                     | 0.897 | 0.899 | -420.4                      | -692.9 | -737.9  | 0.43-0.36                      | 0.34-0.32 | 0.36-0.35 |
| <b>C2</b> | 0.997           | 1.014 | 0.978 | 0.882                     | 0.900 | 0.897 | -374.2                      | -657.4 | -689.1  | 0.61-0.55                      | 0.51-0.44 | 0.42-0.38 |
| <b>C3</b> | 0.989           | 0.997 | 0.977 | 0.885                     | 0.906 | 0.903 | -421.8                      | -931.0 | -991.2  | 0.66-0.58                      | 0.54-0.49 | 0.51-0.48 |
| <b>C4</b> | 0.990           | 1.014 | 0.985 | 0.884                     | 0.915 | 0.912 | -489.5                      | -972.4 | -1000.3 | 0.81-0.73                      | 0.61-0.57 | 0.57-0.53 |

  

|           | OCP / V vs. RHE |       |       | $E_{onset}^b$ / V vs. RHE |       |       | $j^d$ / mA cm <sup>-2</sup> |        |        | $R$ / $\Omega$ cm <sup>2</sup> |           |           |
|-----------|-----------------|-------|-------|---------------------------|-------|-------|-----------------------------|--------|--------|--------------------------------|-----------|-----------|
|           | I               | II    | III   | I                         | II    | III   | I                           | II     | III    | I                              | II        | III       |
| <b>A1</b> | 0.142           | 0.116 | 0.058 | 0.276                     | 0.250 | 0.124 | 208.3                       | 234.2  | 356.0  | 0.31-0.33                      | 0.28-0.29 | 0.2-0.23  |
| <b>A2</b> | 0.106           | 0.073 | 0.029 | 0.199                     | 0.161 | 0.071 | 317.2                       | 487.0  | 895.8  | 0.43-0.45                      | 0.31-0.32 | 0.24-0.28 |
| <b>A3</b> | 0.093           | 0.054 | 0.023 | 0.155                     | 0.095 | 0.037 | 482.4                       | 1131.1 | 1152.7 | 0.58-0.59                      | 0.41-0.45 | 0.35-0.37 |
| <b>A4</b> | 0.076           | 0.054 | 0.022 | 0.157                     | 0.096 | 0.031 | 543.3                       | 1144.0 | 1762.3 | 0.53-0.55                      | 0.35-0.39 | 0.27-0.32 |

OCP = open circuit potential;  $E_{onset}$  = onset potential;  $R$  = resistance range;  $j$  = current density; <sup>a</sup> at -10 mA cm<sup>-2</sup>; <sup>b</sup> at 10 mA cm<sup>-2</sup>; <sup>c</sup>  $j$  at 0.75 V vs RHE; <sup>d</sup>  $j$  at 0.5 V vs RHE

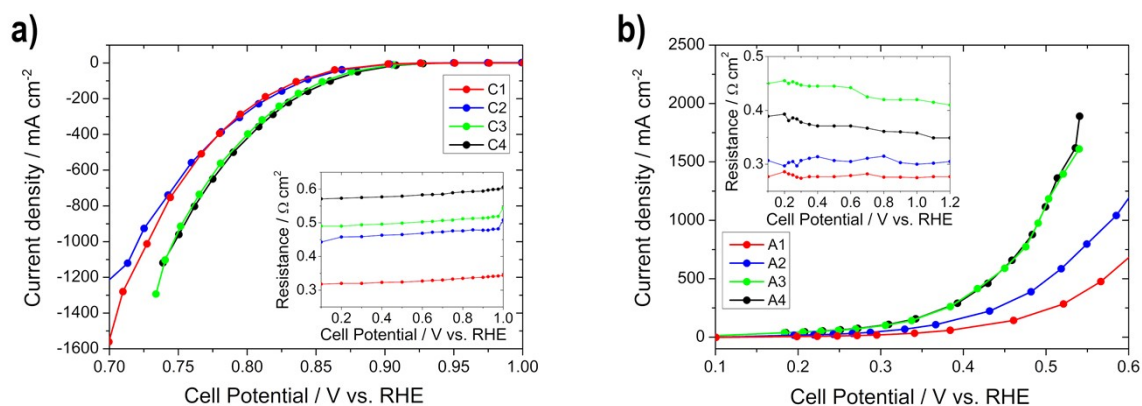

**Figure S2:** Polarization curves a) for the determination of the ORR activity for the cathodes C1 – C4 and b) for the determination of the EOR activity for the anodes A1 – A4 at condition II (resistances of the impedance spectra for iR-compensation in the insets).

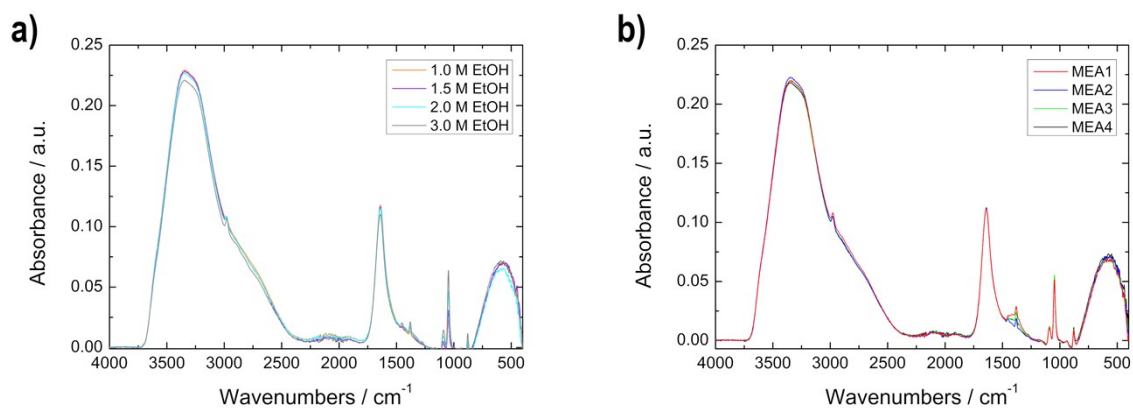

**Figure S3:** The IR spectrum a) for the EtOH calibration peaks and b) for the evaluation of the consume of ethanol.

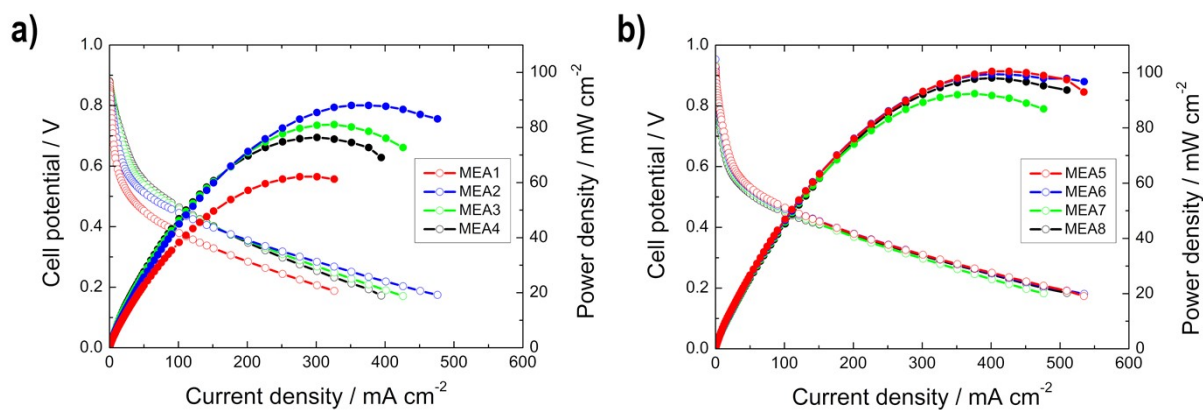

**Figure S4:** Power density (filled symbols) and polarization curves (unfilled symbols) of the single cell measurements of a) the MEA1 - MEA4 and b) the MEA5 - MEA8 at condition II.
